# Supplementary material for: Fast Projection Matching for X-ray Tomography
Source: PubMed Central journal article supplement (PMC5473817; doi:10.1038/s41598-017-04020-0), 2017-06-16
Supplement: 41598_2017_4020_MOESM1_ESM.pdf [file 41598_2017_4020_MOESM1_ESM.pdf]

Supplementary Information

**Fast Projection Matching for X-ray Tomography**

Chun-Chieh Wang<sup>1\*</sup>, Cheng-Cheng Chiang<sup>1</sup>, Biqing Liang<sup>2\*\*</sup>, Gung-Chian Yin<sup>1</sup>,  
Yi-Tse Weng<sup>2</sup>, and Liang-Chi Wang<sup>3</sup>

<sup>1</sup>National Synchrotron Radiation Research Center, 30076 Hsinchu, Taiwan.

<sup>2</sup> Department of Earth Sciences, National Cheng Kung University, 70101 Tainan, Taiwan.

<sup>3</sup> Collection Management Department, National Taiwan Museum, 10047 Taipei, Taiwan.

**CORRESPONDING AUTHOR**

Chun-Chieh Wang (E-mail: [wang.jay@nsrrc.org.tw](mailto:wang.jay@nsrrc.org.tw))

**CO-CORRESPONDING AUTHOR**

Biqing Liang (E-mail: [betacau07@gmail.com](mailto:betacau07@gmail.com))

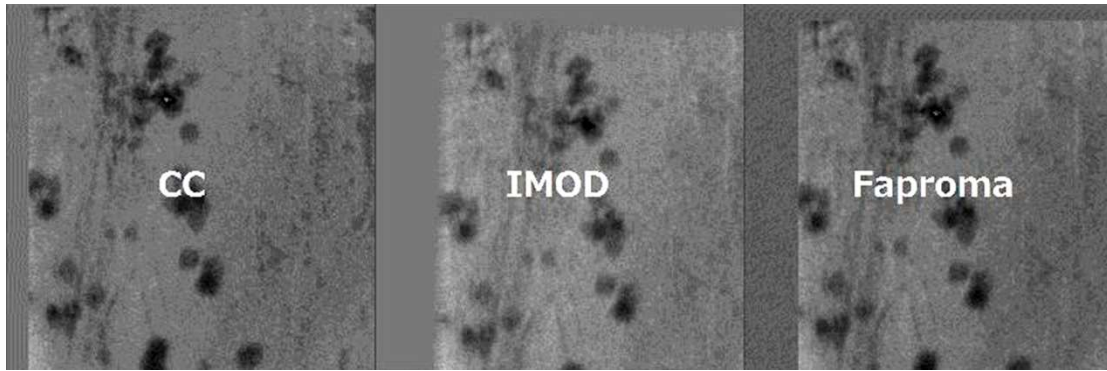

**Supplementary Movie S1.** Comparison of alignment quality among cross-correlation, IMOD, and Faproma methods.

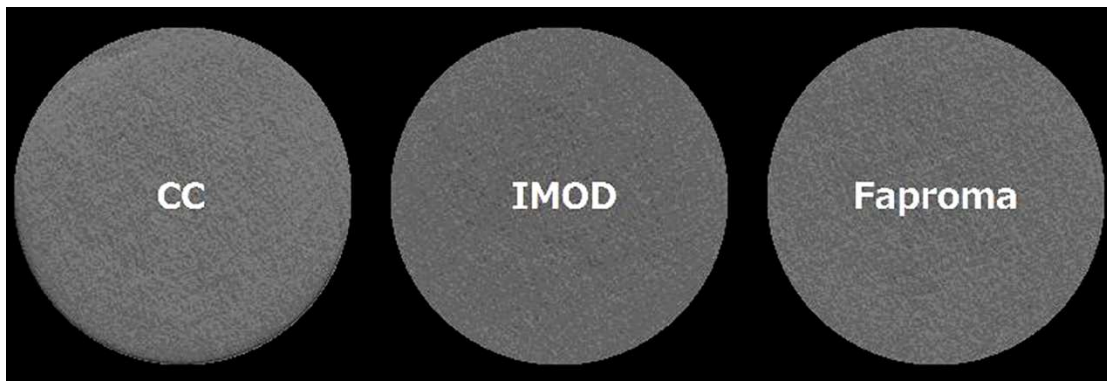

**Supplementary Movie S2.** Comparison of reconstruction quality among cross-correlation, IMOD, and Faproma methods.

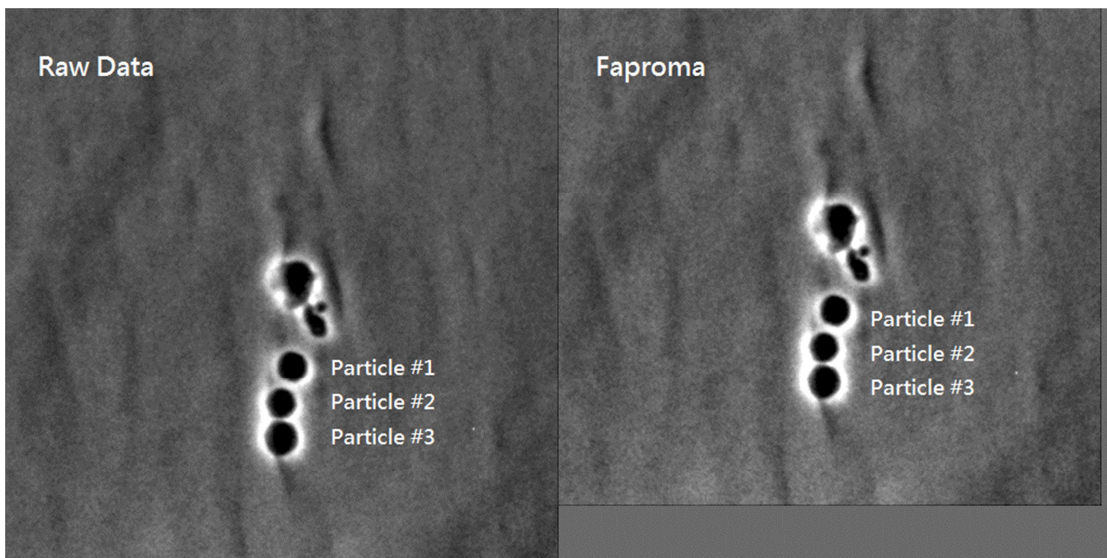

**Supplementary Movie S3.** Alignment accuracy evaluation of Faproma.

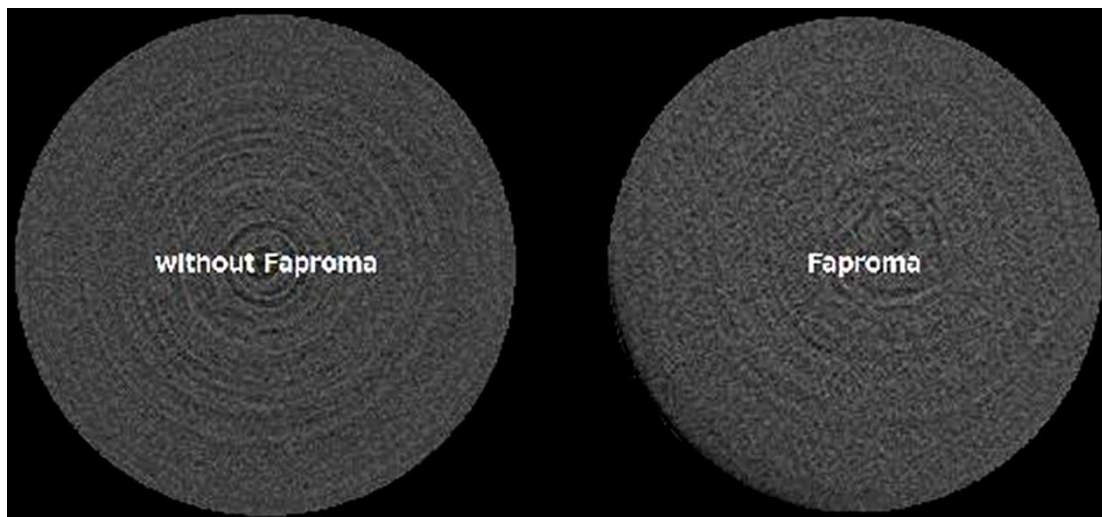

**Supplementary Movie S4.** Comparison of reconstruction quality between with and without image registration using Faproma.

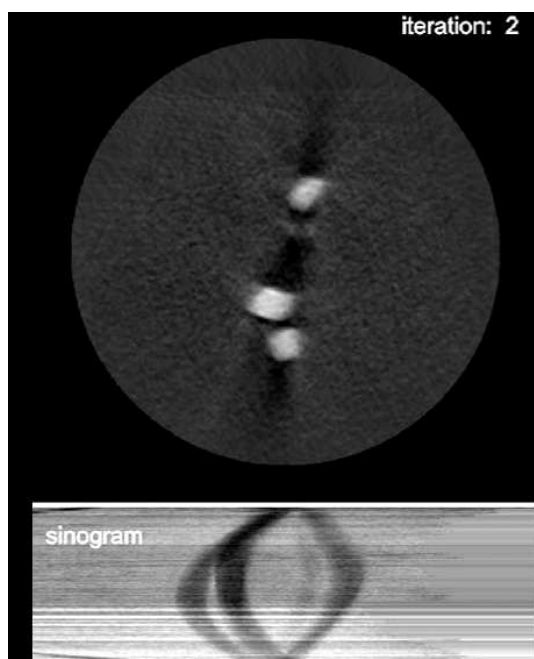

**Supplementary Movie S5.** Comparisons of reconstruction and sinogram alignment quality during the iteration process of Faproma.
